# Supplementary material for: Impact ofin vitrodigestion phases on the stability and bioaccessibility of carotenoids and their esters in mandarin pulps
Source: Royal Society of Chemistry journal article supplement (doi:10.1039/c7fo01075c), 2017-01-01
Supplement: c7fo01075c1.pdf [file c7fo01075c1.pdf]

## Impact of *in vitro* digestion phases on the stability and bioaccessibility of carotenoids and their esters in mandarin pulps

Fabiane Cristina Petry and Adriana Zerlotti Mercadante\*

### Electronic Supplementary Material

**Table S1.** Carotenoid contents in pulps of mandarin cvs. 'Ponkan', 'Rio' and 'Murcott', and in the aqueous phase containing the bioaccessible carotenoids after *in vitro* digestion

| Carotenoid                                 | Fresh fruit (µg/100g fresh weight) |            |             | Supernatant digesta (µg/100g fresh weight) |            |            |
|--------------------------------------------|------------------------------------|------------|-------------|--------------------------------------------|------------|------------|
|                                            | Ponkan                             | Rio        | Murcott     | Ponkan                                     | Rio        | Murcott    |
| (13Z)- or (15Z)-β-cryptoxanthin            | 2.3 ± 0.4                          | 3.3 ± 0.7  | nd          | 2.8 ± 0.7                                  | 0.7 ± 0.08 | nd         |
| (all- <i>E</i> )-β-cryptoxanthin           | 101.1 ± 3.2                        | 84.8 ± 2.2 | 83.5 ± 2.9  | 41.9 ± 1.8                                 | 27.7 ± 0.2 | 32.9 ± 2.1 |
| phytoene                                   | 35.7 ± 2.1                         | 24.5 ± 1.1 | 46.5 ± 1.7  | 11.1 ± 0.4                                 | 5.3 ± 0.4  | 14.8 ± 1.2 |
| phytofluene isomer 1                       | 38.8 ± 0.6                         | 23.7 ± 0.6 | 60.5 ± 2    | 7.6 ± 1.6                                  | 3.2 ± 0.5  | 17.2 ± 2.2 |
| phytofluene isomer 2                       | 2.5 ± 0.4                          | 0.6 ± 0.2  | nd          | 1.2 ± 0.2                                  | 0.5 ± 0.1  | nd         |
| ζ-carotene isomer 1                        | 124.0 ± 9.3                        | 30.0 ± 1.1 | 206.5 ± 6.6 | 20.1 ± 4.4                                 | 4.8 ± 0.5  | 52.2 ± 7.7 |
| ζ-carotene isomer 2                        | 10.2 ± 0.5                         | nd         | 17.3 ± 1.3  | 2.8 ± 0.2                                  | nd         | 4.9 ± 0.6  |
| ζ-carotene isomer 3                        | 23.6 ± 6.2                         | 6.9 ± 0.7  | 28.9 ± 1.4  | 11.1 ± 1.9                                 | 1.9 ± 0.2  | 13.9 ± 0.5 |
| (all- <i>E</i> )-β-carotene                | 75.6 ± 1.6                         | 59.6 ± 0.4 | 67.7 ± 2.3  | 11.8 ± 1.7                                 | 16.4 ± 2.3 | 24.6 ± 4.6 |
| ζ-carotene isomer 4                        | 9.2 ± 2.3                          | 0.9 ± 0.4  | 6.3 ± 1.5   | 3.1 ± 0.8                                  | 0.3 ± 0.09 | 3.9 ± 0.3  |
| (9Z)-violaxanthin dilaurate                | 27.0 ± 0.1                         | 5.5 ± 1.1  | nd          | nd                                         | nd         | nd         |
| (13Z)- or (15Z)-β-cryptoxanthin laurate    | 73.9 ± 4.0                         | 20.9 ± 2.0 | 77.4 ± 13.9 | 13.5 ± 0.4                                 | 5.0 ± 0.9  | 23.7 ± 3.3 |
| (9Z)-violaxanthin laurate-myristate        | 48.7 ± 1.4                         | 17.8 ± 4.0 | nd          | nd                                         | nd         | nd         |
| ni. (all- <i>E</i> )-β-cryptoxanthin ester | 45.5 ± 2.2                         | nd         | 27.4 ± 5.6  | 6.9 ± 1.3                                  | nd         | 9.7 ± 2.6  |
| (13Z)- or (15Z)-β-cryptoxanthin            | 48.9 ± 1.1                         | 14.2 ± 0.5 | 48.9 ± 2.1  | 6.7 ± 0.6                                  | 2.5 ± 0.4  | 15.5 ± 3.0 |

|                                                                                                                                                                   |             |             |             |            |            |              |
|-------------------------------------------------------------------------------------------------------------------------------------------------------------------|-------------|-------------|-------------|------------|------------|--------------|
| myristoleate                                                                                                                                                      |             |             |             |            |            |              |
| (all- <i>E</i> )-β-cryptoxanthin laurate                                                                                                                          | 339.7 ± 3.4 | 150.4 ± 4.7 | 340.0 ± 7.2 | 56.1 ± 3.8 | 33.7 ± 5.4 | 109.8 ± 13.9 |
| (9 <i>Z</i> )-β-cryptoxanthin laurate                                                                                                                             | 29.9 ± 1.0  | 12.7 ± 2.5  | 46.9 ± 4.8  | 5.8 ± 0.3  | 3.9 ± 1.2  | 15.9 ± 3.2   |
| (13 <i>Z</i> )- or (15 <i>Z</i> )-β-cryptoxanthin palmitoleate                                                                                                    | 58.2 ± 2.7  | 36.7 ± 1.3  | 57.5 ± 4.6  | 9.6 ± 0.7  | 9.7 ± 2.1  | 18.2 ± 2.7   |
| (all- <i>E</i> )-violaxanthin myristate oleate + (9 <i>Z</i> )- or (9' <i>Z</i> )-antheraxanthin dilaurate + (13 <i>Z</i> )/(15 <i>Z</i> )-β-cryptoxanthin oleate | 23.8 ± 1.2  | 12.2 ± 2.5  | 39.9 ± 6.1  | 4.6 ± 0.5  | 2.2 ± 0.6  | 10.4 ± 1.7   |
| (all- <i>E</i> )-antheraxanthin laurate-myristate + (9 <i>Z</i> )- or (9' <i>Z</i> )-luteoxanthin laurate-palmitate                                               | 22.1 ± 0.9  | 7.6 ± 0.5   | 18.3 ± 1.7  | 2.9 ± 0.2  | 1.8 ± 0.4  | 5.6 ± 1.2    |
| (all- <i>E</i> )-β-cryptoxanthin myristate                                                                                                                        | 280.5 ± 6.6 | 213.8 ± 6.2 | 267.8 ± 6.3 | 49.5 ± 6.3 | 52.3 ± 9.7 | 85.7 ± 12.5  |
| (9 <i>Z</i> )-β-cryptoxanthin myristate                                                                                                                           | nd          | nd          | 12.9 ± 0.4  | nd         | nd         | 4.8 ± 1.0    |
| (all- <i>E</i> )-β-cryptoxanthin oleate                                                                                                                           | 31.1 ± 1.7  | 47.8 ± 1.1  | 46.5 ± 1.1  | 6.8 ± 0.7  | 12.2 ± 2.4 | 17.9 ± 2.7   |
| (9 <i>Z</i> )-β-cryptoxanthin oleate + (9 <i>Z</i> )-antheraxanthin laurate-myristate + (9 <i>Z</i> )-zeinoxanthin myristate                                      | 38.7 ± 3.9  | 19.8 ± 2.2  | 46.5 ± 7.6  | 8.0 ± 1.3  | 4.2 ± 0.9  | 14.4 ± 2.1   |
| (13 <i>Z</i> )- or (15 <i>Z</i> )-β-cryptoxanthin palmitate + (all- <i>E</i> )-antheraxanthin dimyristate                                                         | 24.8 ± 1.1  | 24.9 ± 1.1  | 24.9 ± 2.3  | 2.8 ± 0.4  | 4.4 ± 1.0  | 7.8 ± 1.6    |
| lutein 3- <i>O</i> -myristate-3'- <i>O</i> -laurate + lutein 3- <i>O</i> -laurate-3- <i>O</i> '-myristate                                                         | 19.8 ± 1.5  | 17.1 ± 1.2  | 41.6 ± 1.2  | 2.7 ± 0.2  | 4.3 ± 1.3  | 12.4 ± 2.7   |
| (all- <i>E</i> )-β-cryptoxanthin palmitate                                                                                                                        | 73.1 ± 2.8  | 103.3 ± 6.0 | 129.8 ± 4.6 | 15.1 ± 1.9 | 29.1 ± 6.3 | 43.5 ± 7.8   |
| lutein 3- <i>O</i> -palmitate-3'- <i>O</i> -laurate                                                                                                               | 3.6 ± 0.7   | 6.9 ± 0.4   | 11.3 ± 1.6  | 0.2 ± 0.1  | 1.2 ± 0.5  | 3.5 ± 1.7    |
| (9 <i>Z</i> )-β-cryptoxanthin palmitate                                                                                                                           | 24.5 ± 0.6  | 19.8 ± 0.7  | 25.5 ± 2.9  | 4.7 ± 0.2  | 4.9 ± 0.9  | 7.7 ± 1.9    |
| Total carotenoids                                                                                                                                                 | 1647 ± 53   | 965 ± 22    | 1772 ± 57   | 309 ± 23   | 235 ± 37   | 593 ± 88     |

Results are expressed as mean ± standard deviation of triplicate analysis (n = 3).

**Table S2.** Sum of the contents of *Z*- and all-*E*- isomers of  $\beta$ -cryptoxanthin (free and esterified with lauric, myristic and palmitic acids), and respective percentages, in frozen pulp and in the different phases of *in vitro* digestion

| Carotenoid                                                                        | Carotenoid contents ( $\mu\text{g}/100\text{g}$ ) |                                                |                                                 |                                                |                                                |                                               |
|-----------------------------------------------------------------------------------|---------------------------------------------------|------------------------------------------------|-------------------------------------------------|------------------------------------------------|------------------------------------------------|-----------------------------------------------|
|                                                                                   | Frozen pulp                                       | Oral phase                                     | Oral + Gastric phases                           |                                                | Oral + Gastric + Duodenal phases               |                                               |
|                                                                                   |                                                   |                                                | Digesta                                         | Sup + Ppt                                      | Digesta                                        | Sup + Ppt                                     |
| (13 <i>Z</i> )- or (15 <i>Z</i> )- $\beta$ -cryptoxanthin                         | 9.4 $\pm$ 1.7<br>(9.1%)                           | 9.2 $\pm$ 2.3<br>(8.9%)                        | 10.2 $\pm$ 0.1<br>(11.6%)                       | 7.4 $\pm$ 1.1<br>(9.2%)                        | 10.6 $\pm$ 1.1<br>(9.9%)                       | 8.9 $\pm$ 1.1<br>(8.9%)                       |
| (all- <i>E</i> )- $\beta$ -cryptoxanthin                                          | 93.5 $\pm$ 1.5<br>(90.9%)                         | 93.8 $\pm$ 7.7<br>(91.1%)                      | 78.6 $\pm$ 7.6<br>(88.4%)                       | 73.3 $\pm$ 6.0<br>(90.8%)                      | 96.5 $\pm$ 3.9<br>(90.1%)                      | 91.1 $\pm$ 8.3<br>(91.1%)                     |
| <b><math>\Sigma</math> <math>\beta</math>-cryptoxanthin</b>                       | <b>102.9 <math>\pm</math> 3.2</b>                 | <b>103.0 <math>\pm</math> 9.2</b>              | <b>88.9 <math>\pm</math> 7.4</b>                | <b>80.7 <math>\pm</math> 6.2</b>               | <b>107.1 <math>\pm</math> 2.9</b>              | <b>100.0 <math>\pm</math> 8.3</b>             |
| (13 <i>Z</i> )- or (15 <i>Z</i> )- $\beta$ -cryptoxanthin laurate                 | 99.0 $\pm$ 8.3<br>(18.3%)                         | 94.9 $\pm$ 6.5<br>(18.2%)                      | 75.6 $\pm$ 11.8<br>(17.4%)                      | 77.4 $\pm$ 4.5<br>(17.6%)                      | 73.4 $\pm$ 6.6<br>(17.8%)                      | 70.7 $\pm$ 0.3<br>(17.5%)                     |
| (all- <i>E</i> )- $\beta$ -cryptoxanthin laurate                                  | 382.3 $\pm$ 6.4<br>(70.6%)                        | 357.9 $\pm$ 24.5<br>(68.5%)                    | 306.6 $\pm$ 51.3<br>(70.7%)                     | 308.4 $\pm$ 19.1<br>(70.1%)                    | 287.7 $\pm$ 24.3<br>(69.9%)                    | 282.4 $\pm$ 1.5<br>(69.9%)                    |
| (9 <i>Z</i> )- $\beta$ -cryptoxanthin laurate                                     | 60.2 $\pm$ 4.7<br>(11.1%)                         | 69.4 $\pm$ 8.0<br>(13.3%)                      | 51.2 $\pm$ 13.9<br>(11.8%)                      | 54.3 $\pm$ 4.3<br>(12.3%)                      | 50.6 $\pm$ 3.9<br>(12.3%)                      | 51.0 $\pm$ 0.1<br>(12.6%)                     |
| <b><math>\Sigma</math> <math>\beta</math>-cryptoxanthin laurate</b>               | <b>541.5 <math>\pm</math> 8.9</b>                 | <b>522.2 <math>\pm</math> 37.4</b>             | <b>433.4 <math>\pm</math> 47.0</b>              | <b>440.2 <math>\pm</math> 27.9</b>             | <b>411.7 <math>\pm</math> 33.8</b>             | <b>404.2 <math>\pm</math> 1.4</b>             |
| (all- <i>E</i> )- $\beta$ -cryptoxanthin myristate                                | 281.4 $\pm$ 5.1<br>(94.4%)                        | 265.6 $\pm$ 19.8<br>(94.6%)                    | 223.5 $\pm$ 45.9<br>(94.8%)                     | 226.5 $\pm$ 13.5<br>(94.8%)                    | 205.4 $\pm$ 16.3<br>(94.9%)                    | 205.9 $\pm$ 2.3<br>(95.0%)                    |
| (9 <i>Z</i> )- $\beta$ -cryptoxanthin myristate                                   | 16.8 $\pm$ 2.1<br>(5.6%)                          | 15.3 $\pm$ 1.8<br>(5.4%)                       | 12.1 $\pm$ 3.7<br>(5.2%)                        | 12.4 $\pm$ 1.2<br>(5.2%)                       | 10.9 $\pm$ 0.6<br>(5.1%)                       | 10.8 $\pm$ 0.7<br>(5.0%)                      |
| <b><math>\Sigma</math> <math>\beta</math>-cryptoxanthin myristate</b>             | <b>298.3 <math>\pm</math> 4.1</b>                 | <b>280.9 <math>\pm</math> 21.5</b>             | <b>235.7 <math>\pm</math> 49.6</b>              | <b>238.9 <math>\pm</math> 14.2</b>             | <b>216.3 <math>\pm</math> 16.5</b>             | <b>216.7 <math>\pm</math> 1.9</b>             |
| (all- <i>E</i> )- $\beta$ -cryptoxanthin palmitate                                | 127.8 $\pm$ 4.8<br>(82.7%)                        | 120.3 $\pm$ 11.2<br>(82.6%)                    | 99.8 $\pm$ 28.5<br>(83.1%)                      | 103.9 $\pm$ 6.1<br>(83.2%)                     | 90.5 $\pm$ 6.1<br>(83.1%)                      | 95.1 $\pm$ 2.5<br>(81.1%)                     |
| (9 <i>Z</i> )- $\beta$ -cryptoxanthin palmitate                                   | 26.7 $\pm$ 5.2<br>(17.3%)                         | 25.4 $\pm$ 4.3<br>(17.4%)                      | 20.4 $\pm$ 5.1<br>(16.9%)                       | 20.9 $\pm$ 3.0<br>(16.8%)                      | 18.4 $\pm$ 1.4<br>(16.9%)                      | 22.1 $\pm$ 3.9<br>(18.9%)                     |
| <b><math>\Sigma</math> <math>\beta</math>-cryptoxanthin palmitate</b>             | <b>154.6 <math>\pm</math> 9.9</b>                 | <b>145.7 <math>\pm</math> 15.1</b>             | <b>120.1 <math>\pm</math> 33.5</b>              | <b>124.9 <math>\pm</math> 9.1</b>              | <b>108.9 <math>\pm</math> 6.4</b>              | <b>117.3 <math>\pm</math> 6.4</b>             |
| <b><math>\Sigma</math> (all-<i>E</i>)-<math>\beta</math>-cryptoxanthin esters</b> | <b>872.0 <math>\pm</math> 6.2<br/>(73.4%)</b>     | <b>818.6 <math>\pm</math> 58.1<br/>(72.0%)</b> | <b>689.1 <math>\pm</math> 139.0<br/>(73.9%)</b> | <b>697.5 <math>\pm</math> 41.6<br/>(73.1%)</b> | <b>641.3 <math>\pm</math> 48.7<br/>(72.6%)</b> | <b>642.0 <math>\pm</math> 2.1<br/>(72.2%)</b> |

|                                                                        |                             |                             |                             |                             |                             |                           |
|------------------------------------------------------------------------|-----------------------------|-----------------------------|-----------------------------|-----------------------------|-----------------------------|---------------------------|
| <b><math>\Sigma</math> (Z)-<math>\beta</math>-cryptoxanthin esters</b> | 316.4 $\pm$ 21.8<br>(26.6%) | 317.8 $\pm$ 26.4<br>(28.0%) | 242.6 $\pm$ 40.2<br>(26.1%) | 257.2 $\pm$ 18.5<br>(26.9%) | 241.6 $\pm$ 16.1<br>(27.4%) | 246.8 $\pm$ 2.3<br>(27.3) |
| <b><math>\Sigma</math> <math>\beta</math>-cryptoxanthin esters</b>     | 1188.4 $\pm$ 16.4           | 1136.4 $\pm$ 84.4           | 931.7 $\pm$ 179.9           | 954.6 $\pm$ 60.1            | 882.9 $\pm$ 63.4            | 888.9 $\pm$ 2.5           |

Digesta refers to the whole material resultant from each digestion phase, containing the compounds liberated from the matrix and the undigested material. When digesta was submitted to a centrifugation process, a supernatant fraction (Sup) containing the carotenoids liberated from the matrix and a precipitated fraction (Ppt) corresponding to the undigested material was obtained. Percent value of each carotenoid was calculated in relation to the sum of all isomers of this carotenoid.

**Table S3.** Sum of the contents of all isomer forms of phytofluene and  $\zeta$ -carotene and respective percentages, in frozen pulp and in the different phases of *in vitro* digestion

| Carotenoid                                             | Carotenoid contents ( $\mu\text{g}/100\text{g}$ ) |                                    |                                    |                                    |                                   |                                   |
|--------------------------------------------------------|---------------------------------------------------|------------------------------------|------------------------------------|------------------------------------|-----------------------------------|-----------------------------------|
|                                                        | Frozen pulp                                       | Oral phase                         | Oral + Gastric phases              |                                    | Oral + Gastric + Duodenal phases  |                                   |
|                                                        |                                                   |                                    | Digesta                            | Sup + Ppt                          | Digesta                           | Sup + Ppt                         |
| phytofluene isomer 1                                   | 63.6 $\pm$ 2.4<br>(100%)                          | 56.3 $\pm$ 3.8<br>(100%)           | 48.5 $\pm$ 5.9<br>(87.7%)          | 54.3 $\pm$ 3.8<br>(91.3%)          | 40.9 $\pm$ 0.7<br>(91.1%)         | 40.7 $\pm$ 2.1<br>(88.9%)         |
| phytofluene isomer 2                                   | <LOQ                                              | <LOQ                               | 6.8 $\pm$ 1.8<br>(12.3%)           | 5.2 $\pm$ 0.3<br>(8.7%)            | 4.0 $\pm$ 0.5<br>(8.9%)           | 5.1 $\pm$ 0.6<br>(11.1%)          |
| <b><math>\Sigma</math> phytofluene</b>                 | <b>63.6 <math>\pm</math> 2.4</b>                  | <b>56.3 <math>\pm</math> 3.8</b>   | <b>55.3 <math>\pm</math> 7.7</b>   | <b>59.5 <math>\pm</math> 3.9</b>   | <b>44.9 <math>\pm</math> 0.2</b>  | <b>45.8 <math>\pm</math> 2.5</b>  |
| $\zeta$ -carotene isomer 1                             | 203.4 $\pm$ 8.3<br>(82.2%)                        | 187.1 $\pm$ 11.9<br>(81.8%)        | 147.2 $\pm$ 19.3<br>(69.6%)        | 140.8 $\pm$ 14.6<br>(64.6%)        | 115.4 $\pm$ 8.4<br>(66.3%)        | 112.3 $\pm$ 4.4<br>(66.9%)        |
| $\zeta$ -carotene isomer 2                             | 9.3 $\pm$ 0.3<br>(3.8%)                           | 8.2 $\pm$ 1.7<br>(3.6%)            | 11.4 $\pm$ 0.3<br>(5.4%)           | 12.3 $\pm$ 0.5<br>(5.6%)           | 9.9 $\pm$ 1.8<br>(5.7%)           | 9.2 $\pm$ 0.9<br>(5.5%)           |
| $\zeta$ -carotene isomer 3                             | 28.7 $\pm$ 0.3<br>(11.6%)                         | 25.9 $\pm$ 2.7<br>(11.3%)          | 43.0 $\pm$ 7.7<br>(20.3%)          | 49.3 $\pm$ 1.8<br>(22.6%)          | 40.3 $\pm$ 6.9<br>(23.1%)         | 37.9 $\pm$ 3.1<br>(22.6%)         |
| $\zeta$ -carotene isomer 4                             | 5.8 $\pm$ 2.4<br>(2.3%)                           | 7.9 $\pm$ 2.5<br>(3.4%)            | 9.8 $\pm$ 0.4<br>(4.6%)            | 15.4 $\pm$ 2.6<br>(7.1%)           | 8.5 $\pm$ 0.4<br>(4.9%)           | 8.6 $\pm$ 1.3<br>(5.1%)           |
| <b><math>\Sigma</math> <math>\zeta</math>-carotene</b> | <b>247.5 <math>\pm</math> 5.8</b>                 | <b>229.1 <math>\pm</math> 15.9</b> | <b>211.4 <math>\pm</math> 27.1</b> | <b>217.8 <math>\pm</math> 10.8</b> | <b>174.1 <math>\pm</math> 7.9</b> | <b>167.9 <math>\pm</math> 5.2</b> |

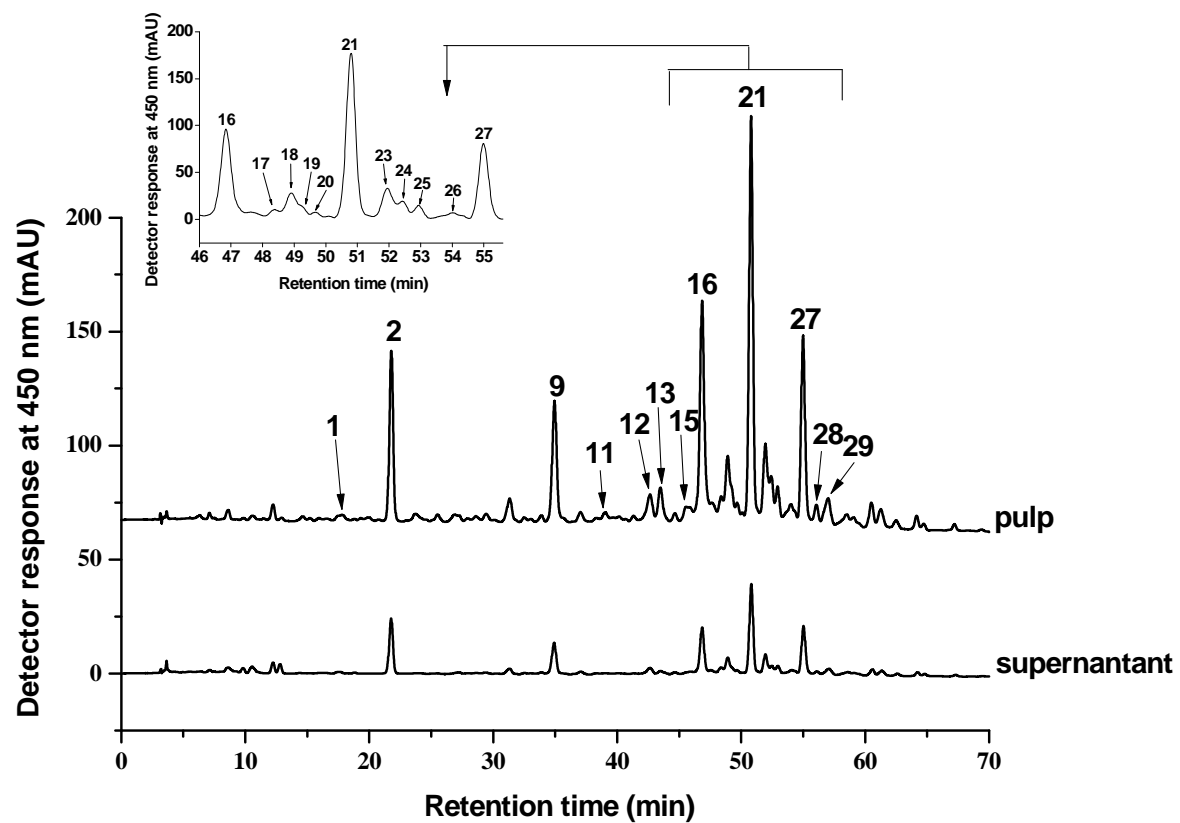

**Figure S1.** Chromatograms, obtained by HPLC-DAD at 450 nm, of carotenoid extracts from mandarin cv. 'Rio' before and after *in vitro* digestion.

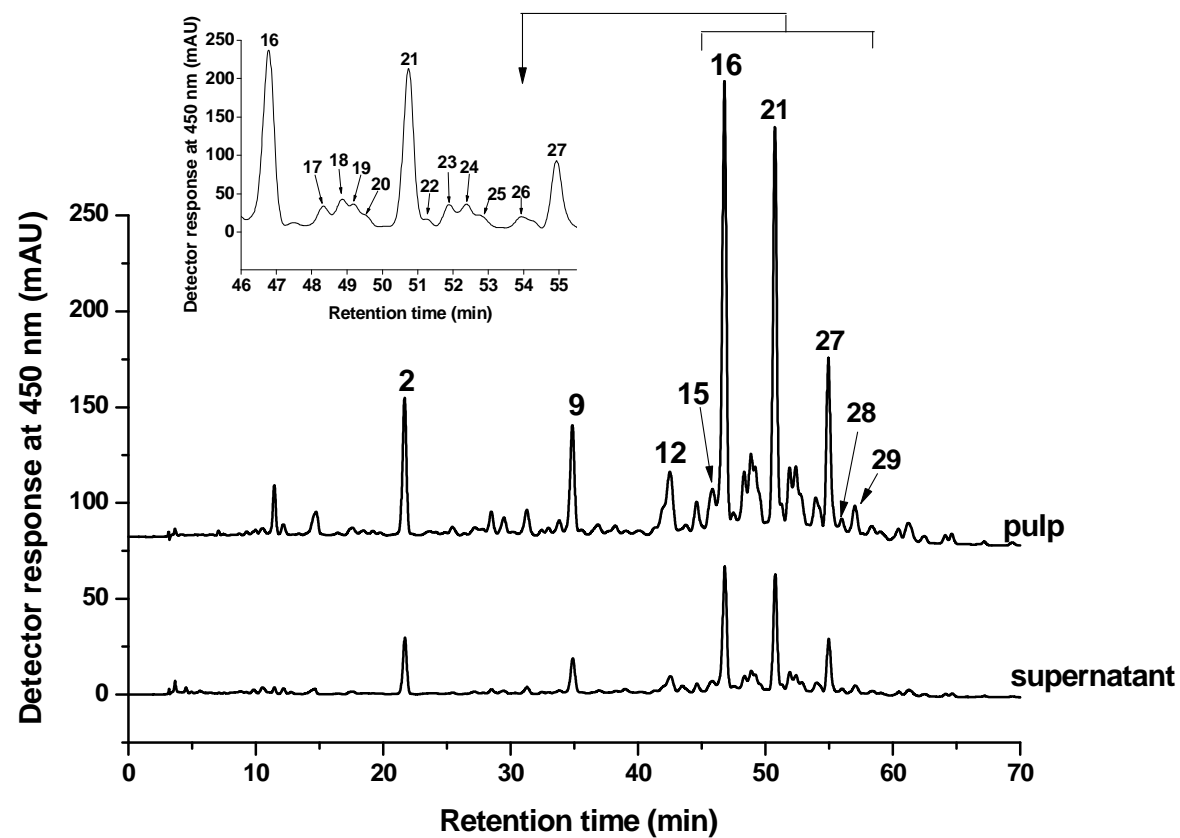

**Figure S2.** Chromatograms, obtained by HPLC-DAD at 450 nm, of carotenoid extracts from tangor cv. 'Murcott' before and after *in vitro* digestion.
